# Supplementary material
Source: Springer Nature journal article supplement (https://www.springermedizin.de/resource/supplementary/12969_2010_793_MOESM11_ESM.pdf/9593032)

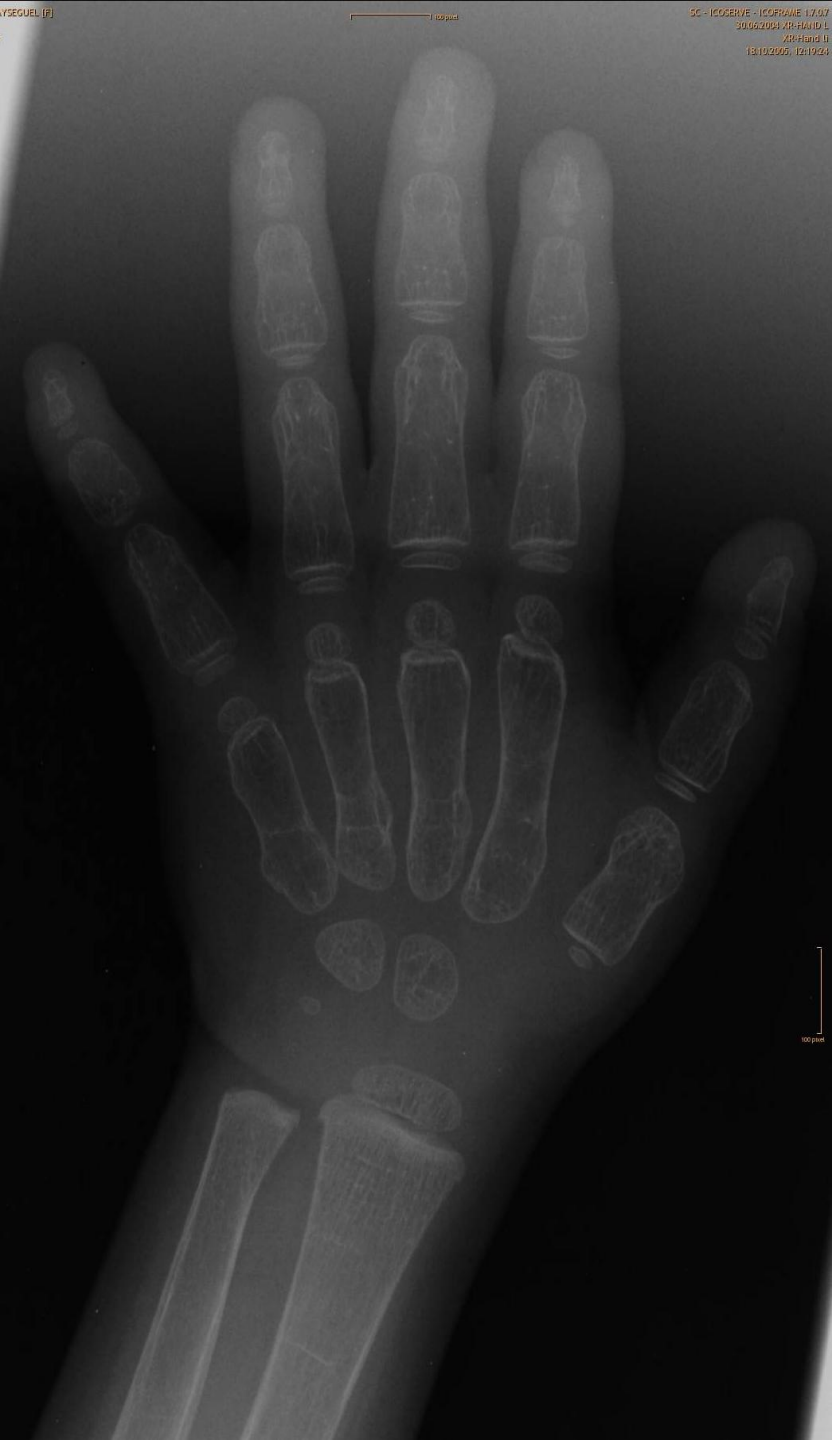

100 pixel

Supplement: MOESM11 [file 9593032]
